# Supplementary material for: Multiple dimensionalities in A2M3(SO4)4 (A = Rb, Cs; M = Co, Ni) analogues
Source: Royal Society of Chemistry journal article supplement (doi:10.1039/d1dt04202e), 2022-01-01
Supplement: d1dt04202e2.pdf [file d1dt04202e2.pdf]

## Multiple dimensionalities in the $A_2M_3(SO_4)_4$ ( $A = Rb, Cs$ $M = Co, Ni$ ) analogues.

Diana O. Nekrasova<sup>1,2</sup>, Olivier Mentré<sup>1</sup>, Oleg I. Siidra<sup>2,3</sup>, Natacha Henry,<sup>1</sup> Marie Colmont<sup>1\*</sup>

<sup>1</sup>Unité de Catalyse et Chimie du Solide (UCCS), UMR 8181, 59655 Villeneuve d'ASCQ, France

<sup>2</sup>Department of Crystallography, St. Petersburg State University, University Embankment 7/9, 199034 St. Petersburg, Russia

<sup>3</sup>Kola Science Center, Russian Academy of Sciences, Apatity, Murmansk Region, 184200, Russia

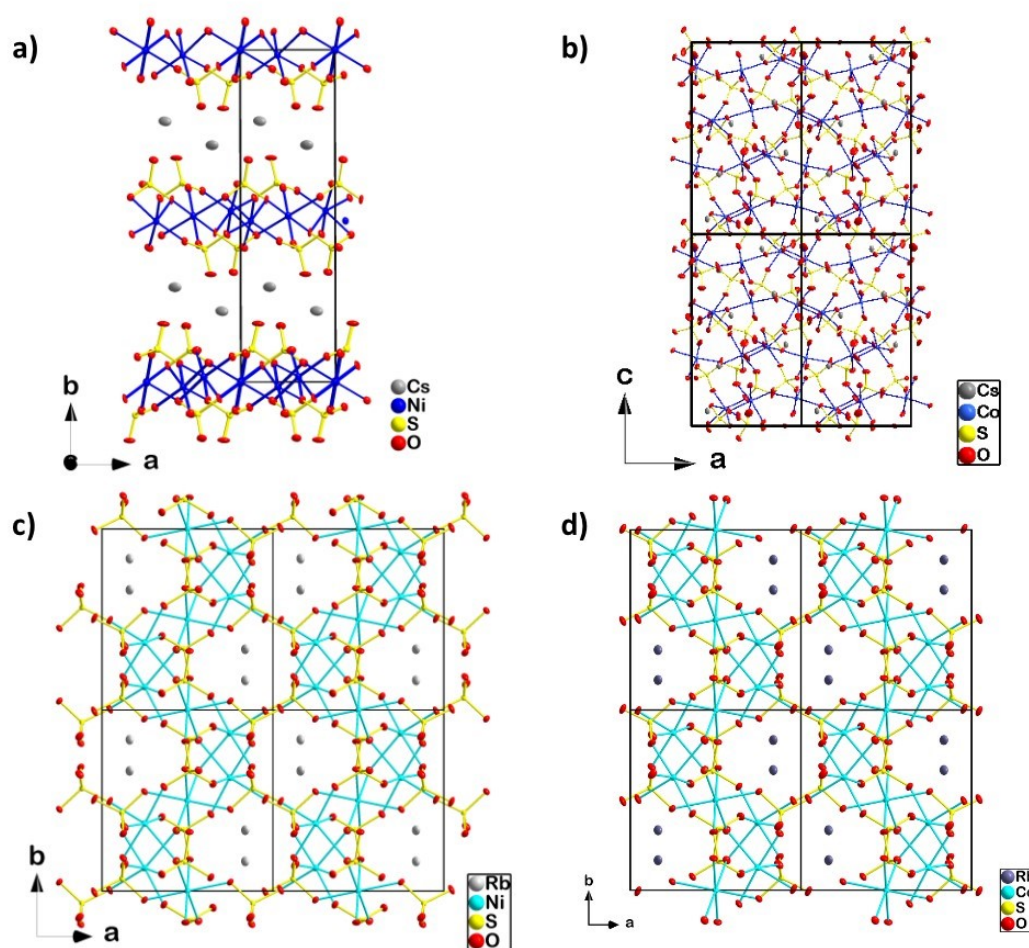

Figure S1. Crystal structure of a)  $Cs_2Ni_3(SO_4)_4$ ,  $Cs_2Co_3(SO_4)_4$ ,  $Rb_2Ni_3(SO_4)_4$  and  $Rb_2Co_3(SO_4)_4$  with ADPs. M-O bonds are drawn in blue and S-O bonds in yellow.

Table S1. Atomic coordinates and equivalent isotropic and anisotropic displacement parameters for **1**  $Cs_2Ni_3(SO_4)_4$

| Wyckoff site | x  | y            | z          | U(eq)       | U11        | U22        | U33       | U23       | U13        | U12       |             |
|--------------|----|--------------|------------|-------------|------------|------------|-----------|-----------|------------|-----------|-------------|
| <b>Cs(1)</b> | 2a | 0.20139(13)  | 0.78636(3) | 0.35957(8)  | 0.0362(2)  | 0.0498(4)  | 0.0302(3) | 0.0374(4) | -0.0015(3) | 0.0275(3) | -0.0061(2)  |
| <b>Ni(1)</b> | 2a | 0            | 1          | 0           | 0.0137(4)  | 0.0124(7)  | 0.0197(7) | 0.0086(7) | 0.0001(5)  | 0.0018(5) | -0.0002(5)  |
| <b>Ni(2)</b> | 2a | -0.10736(18) | 0.51544(5) | 0.17902(12) | 0.0124(3)  | 0.0111(5)  | 0.0178(5) | 0.0078(5) | 0.0002(4)  | 0.0012(4) | 0.0001(3)   |
| <b>S(1)</b>  | 2a | 0.0386(4)    | 0.59580(9) | 0.5735(2)   | 0.0129(6)  | 0.0127(10) | 0.0155(9) | 0.0101(9) | -0.0002(7) | 0.0024(7) | 0.0002(6)   |
| <b>S(2)</b>  | 2a | -0.1194(4)   | 0.90037(9) | 0.6318(2)   | 0.0122(6)  | 0.0113(10) | 0.0145(9) | 0.0097(9) | -0.0005(7) | 0.0005(7) | -0.0010(6)  |
| <b>O(1)</b>  | 2a | 0.0914(10)   | 0.9239(3)  | 0.5506(7)   | 0.0153(18) | 0.012(3)   | 0.022(3)  | 0.011(3)  | 0.000(2)   | 0.001(2)  | 0.000(2)    |
| <b>O(2)</b>  | 2a | -0.1827(11)  | 0.8245(3)  | 0.5931(7)   | 0.024(2)   | 0.042(4)   | 0.010(3)  | 0.022(3)  | 0.000(2)   | 0.012(3)  | -0.001(2)   |
| <b>O(3)</b>  | 2a | 0.0819(11)   | 0.6691(3)  | 0.6413(7)   | 0.0190(18) | 0.024(3)   | 0.017(3)  | 0.016(3)  | -0.001(2)  | 0.005(2)  | -0.005(2)   |
| <b>O(4)</b>  | 2a | 0.2715(9)    | 0.5492(3)  | 0.6487(7)   | 0.0149(18) | 0.005(3)   | 0.027(3)  | 0.011(3)  | 0.004(2)   | -0.001(2) | 0.004(2)    |
| <b>O(5)</b>  | 2a | 0.3381(10)   | 0.9426(3)  | 0.1493(6)   | 0.0148(17) | 0.016(3)   | 0.020(3)  | 0.008(2)  | -0.001(2)  | 0.002(2)  | -0.0014(19) |
| <b>O(6)</b>  | 2a | -0.3525(9)   | 0.9454(3)  | 0.5413(7)   | 0.0141(18) | 0.010(3)   | 0.021(3)  | 0.010(3)  | 0.004(2)   | 0.000(2)  | 0.0035(19)  |
| <b>O(7)</b>  | 2a | -0.0300(10)  | 0.5950(3)  | 0.3770(6)   | 0.0171(18) | 0.023(3)   | 0.021(3)  | 0.007(3)  | -0.004(2)  | 0.003(2)  | -0.001(2)   |
| <b>O(8)</b>  | 2a | -0.0546(10)  | 0.9151(3)  | 0.8281(7)   | 0.0181(18) | 0.014(3)   | 0.026(3)  | 0.012(3)  | 0.001(2)   | -0.001(2) | -0.001(2)   |

Table S2. Atomic coordinates and equivalent isotropic and anisotropic displacement parameters for **2**  $\text{Cs}_2\text{Co}_3(\text{SO}_4)_4$

|              | Wyck<br>off | x            | y           | z          | U(eq)       | U11         | U22         | U33         | U23          | U13         | U12          |
|--------------|-------------|--------------|-------------|------------|-------------|-------------|-------------|-------------|--------------|-------------|--------------|
| <b>Cs(1)</b> | 4a          | -0.14105(4)  | 0.47657(3)  | 0.42298(2) | 0.02193(9)  | 0.01622(14) | 0.01649(13) | 0.03309(18) | -0.00032(12) | 0.00034(14) | 0.00060(10)  |
| <b>Cs(2)</b> | 4a          | 0.25018(4)   | 0.71357(3)  | 0.81336(2) | 0.02164(9)  | 0.02081(15) | 0.01476(13) | 0.02934(17) | 0.00212(13)  | 0.00029(15) | -0.00107(10) |
| <b>Co(1)</b> | 4a          | 0.95950(7)   | 0.84028(6)  | 0.63115(4) | 0.01143(17) | 0.0108(3)   | 0.0110(3)   | 0.0125(3)   | 0.0015(2)    | 0.0013(2)   | 0.0008(2)    |
| <b>Co(2)</b> | 4a          | 0.54592(7)   | 0.56834(6)  | 0.64524(4) | 0.01240(17) | 0.0120(3)   | 0.0118(3)   | 0.0134(3)   | -0.0027(2)   | -0.0018(2)  | -0.0007(2)   |
| <b>Co(3)</b> | 4a          | 0.19322(7)   | 0.40301(6)  | 0.59038(4) | 0.01227(17) | 0.0117(3)   | 0.0111(3)   | 0.0140(3)   | -0.0016(2)   | 0.0005(2)   | -0.0022(2)   |
| <b>S(1)</b>  | 4a          | -0.08849(12) | 0.53524(11) | 0.70152(7) | 0.0100(3)   | 0.0080(4)   | 0.0093(4)   | 0.0127(5)   | 0.0002(4)    | 0.0009(4)   | -0.0002(4)   |
| <b>S(2)</b>  | 4a          | 0.24371(14)  | 0.66934(10) | 0.53825(7) | 0.0104(3)   | 0.0087(5)   | 0.0087(4)   | 0.0138(5)   | 0.0008(4)    | 0.0008(4)   | -0.0003(4)   |
| <b>S(3)</b>  | 4a          | 0.63757(13)  | 0.85710(10) | 0.73474(7) | 0.0098(3)   | 0.0100(5)   | 0.0085(4)   | 0.0108(5)   | 0.0004(4)    | 0.0006(4)   | -0.0014(3)   |
| <b>S(4)</b>  | 4a          | 0.49385(13)  | 0.37045(11) | 0.48940(7) | 0.0103(3)   | 0.0094(5)   | 0.0090(4)   | 0.0124(5)   | 0.0018(4)    | 0.0005(4)   | -0.0019(4)   |
| <b>O(1)</b>  | 4a          | 0.6918(4)    | 0.8012(4)   | 0.8145(2)  | 0.0189(10)  | 0.0276(19)  | 0.0168(16)  | 0.0124(15)  | 0.0044(14)   | -0.0035(15) | 0.0025(13)   |
| <b>O(2)</b>  | 4a          | 0.5391(4)    | 0.9740(3)   | 0.7497(2)  | 0.0163(9)   | 0.0182(17)  | 0.0146(14)  | 0.0161(15)  | 0.0066(14)   | 0.0004(14)  | -0.0027(13)  |
| <b>O(3)</b>  | 4a          | 0.1492(4)    | 0.5668(3)   | 0.4992(2)  | 0.0174(9)   | 0.0160(17)  | 0.0165(15)  | 0.0198(16)  | -0.0057(14)  | -0.0038(14) | 0.0011(13)   |
| <b>O(4)</b>  | 4a          | 0.1595(4)    | 0.7774(4)   | 0.5779(3)  | 0.0241(10)  | 0.0151(17)  | 0.0171(16)  | 0.040(2)    | 0.0053(14)   | 0.0099(17)  | -0.0053(13)  |
| <b>O(5)</b>  | 4a          | -0.0327(4)   | 0.6737(3)   | 0.7111(2)  | 0.0208(10)  | 0.027(2)    | 0.0103(14)  | 0.0252(18)  | -0.0050(14)  | -0.0056(16) | 0.0023(13)   |
| <b>O(6)</b>  | 4a          | 0.5463(4)    | 0.7559(4)   | 0.6907(3)  | 0.0222(10)  | 0.0195(18)  | 0.0162(16)  | 0.031(2)    | -0.0020(14)  | -0.0069(17) | -0.0077(13)  |
| <b>O(7)</b>  | 4a          | 0.3459(4)    | 0.3214(4)   | 0.5110(2)  | 0.0229(11)  | 0.0197(19)  | 0.0246(18)  | 0.0244(19)  | -0.0073(16)  | 0.0100(16)  | -0.0057(13)  |
| <b>O(8)</b>  | 4a          | 0.7593(4)    | 0.9032(3)   | 0.6816(2)  | 0.0195(9)   | 0.0154(16)  | 0.0204(16)  | 0.0228(17)  | 0.0037(15)   | 0.0075(16)  | 0.0055(13)   |
| <b>O(9)</b>  | 4a          | 0.3473(4)    | 0.7316(4)   | 0.4795(2)  | 0.0212(10)  | 0.0221(19)  | 0.0187(17)  | 0.0229(18)  | -0.0085(15)  | 0.0104(16)  | -0.0037(13)  |
| <b>O(10)</b> | 4a          | 0.3250(4)    | 0.5928(3)   | 0.6061(2)  | 0.0183(10)  | 0.0170(18)  | 0.0167(16)  | 0.0212(17)  | -0.0003(13)  | -0.0073(14) | 0.0042(13)   |
| <b>O(11)</b> | 4a          | 0.0021(5)    | 0.4601(4)   | 0.6425(3)  | 0.0390(16)  | 0.039(3)    | 0.029(2)    | 0.049(3)    | 0.007(2)     | 0.028(2)    | -0.007(2)    |
| <b>O(12)</b> | 4a          | -0.2370(5)   | 0.5393(4)   | 0.6678(3)  | 0.0387(14)  | 0.017(2)    | 0.030(2)    | 0.069(3)    | -0.0045(19)  | -0.019(2)   | 0.005(2)     |
| <b>O(13)</b> | 4a          | -0.0914(5)   | 0.4637(4)   | 0.7817(2)  | 0.0290(13)  | 0.048(3)    | 0.0201(18)  | 0.0190(18)  | 0.0013(18)   | -0.0017(18) | 0.0061(13)   |
| <b>O(14)</b> | 4a          | 0.5748(5)    | 0.2623(4)   | 0.4496(3)  | 0.0387(14)  | 0.021(2)    | 0.031(2)    | 0.064(3)    | 0.0133(18)   | -0.005(2)   | -0.031(2)    |
| <b>O(15)</b> | 4a          | 0.4799(6)    | 0.4820(5)   | 0.4322(3)  | 0.0473(17)  | 0.052(3)    | 0.039(3)    | 0.051(3)    | -0.002(2)    | 0.009(3)    | 0.033(2)     |
| <b>O(16)</b> | 4a          | 0.5736(5)    | 0.4153(5)   | 0.5649(3)  | 0.0353(14)  | 0.023(2)    | 0.050(3)    | 0.033(2)    | 0.011(2)     | -0.0116(18) | -0.027(2)    |

Table S3. Atomic coordinates and equivalent isotropic and anisotropic displacement parameters for **3**  
 $\text{Rb}_2\text{Ni}_3(\text{SO}_4)_4$

|              | Wyckoff site | x           | y          | z          | U(eq)       | U11         | U22         | U33         | U23          | U13         | U12          |
|--------------|--------------|-------------|------------|------------|-------------|-------------|-------------|-------------|--------------|-------------|--------------|
| <b>Rb(1)</b> | 4e           | 0.16190(3)  | 0.83602(3) | 0.10182(4) | 0.02202(11) | 0.01613(13) | 0.02297(15) | 0.03236(16) | -0.00033(11) | 0.01601(12) | -0.00377(12) |
| <b>Ni(1)</b> | 2b           |             | 0.5        | 1          | 0           | 0.00840(16) | 0.0092(2)   | 0.0079(2)   | 0.0089(2)    | 0.00033(16) | 0.00503(16)  |
| <b>Ni(2)</b> | 4e           | -0.25109(4) | 0.62716(4) | 0.01507(4) | 0.00943(11) | 0.00919(14) | 0.01071(15) | 0.00957(15) | -0.00217(11) | 0.00548(12) | -0.00246(11) |
| <b>S(1)</b>  | 4e           | 0.51722(7)  | 0.66243(7) | 0.18910(7) | 0.00719(18) | 0.0078(2)   | 0.0078(3)   | 0.0069(2)   | -0.0008(2)   | 0.0043(2)   | -0.00008(19) |
| <b>S(2)</b>  | 4e           | -0.11674(7) | 0.93268(7) | 0.24675(7) | 0.0077(2)   | 0.0072(2)   | 0.0081(3)   | 0.0083(3)   | -0.00051(19) | 0.0042(2)   | -0.00063(19) |
| <b>O(1)</b>  | 4e           | -0.1245(2)  | 0.8167(2)  | 0.1261(2)  | 0.0129(6)   | 0.0131(8)   | 0.0130(9)   | 0.0138(8)   | -0.0030(7)   | 0.0075(7)   | -0.0063(7)   |
| <b>O(2)</b>  | 4e           | 0.4884(2)   | 0.8260(2)  | 0.1352(2)  | 0.0126(7)   | 0.0169(9)   | 0.0089(8)   | 0.0141(8)   | -0.0001(7)   | 0.0092(7)   | 0.0036(7)    |
| <b>O(3)</b>  | 4e           | 0.3630(2)   | 0.5754(2)  | 0.0980(2)  | 0.0142(7)   | 0.0115(8)   | 0.0150(9)   | 0.0158(9)   | -0.0041(7)   | 0.0063(7)   | -0.0056(7)   |
| <b>O(4)</b>  | 4e           | 0.0446(2)   | 1.0073(2)  | 0.3085(2)  | 0.0172(7)   | 0.0106(8)   | 0.0227(10)  | 0.0179(9)   | -0.0081(8)   | 0.0065(7)   | -0.0079(8)   |
| <b>O(5)</b>  | 4e           | 0.3501(2)   | 1.0920(2)  | 0.3318(2)  | 0.0133(7)   | 0.0127(8)   | 0.0151(9)   | 0.0169(9)   | -0.0017(7)   | 0.0109(7)   | -0.0002(7)   |
| <b>O(6)</b>  | 4e           | 0.5648(2)   | 0.8337(2)  | -0.1322(2) | 0.0114(6)   | 0.0133(8)   | 0.0141(8)   | 0.0064(8)   | 0.0009(7)    | 0.0045(7)   | -0.0013(6)   |
| <b>O(7)</b>  | 4e           | 0.2491(2)   | 0.9508(2)  | -0.1617(2) | 0.0118(6)   | 0.0106(8)   | 0.0117(8)   | 0.0122(8)   | 0.0034(7)    | 0.0048(7)   | 0.0028(7)    |
| <b>O(8)</b>  | 4e           | 0.1314(2)   | 0.3552(2)  | 0.1202(2)  | 0.0145(7)   | 0.0171(9)   | 0.0181(10)  | 0.0125(9)   | -0.0053(7)   | 0.0104(7)   | -0.0067(7)   |

Table S4. Atomic coordinates and equivalent isotropic and anisotropic displacement parameters for 4  $\text{Rb}_2\text{Co}_3(\text{SO}_4)_4$

| Wyckoff site | x  | y           | z           | U(eq)       | U11         | U22         | U33         | U23         | U13          | U12          |              |              |
|--------------|----|-------------|-------------|-------------|-------------|-------------|-------------|-------------|--------------|--------------|--------------|--------------|
| <b>Rb(1)</b> | 4e | 1.16213(2)  | 1.16676(2)  | 0.10348(3)  | 0.02433(8)  | 0.01793(8)  | 0.02490(10) | 0.03623(13) | 0.00042(7)   | 0.01794(8)   | 0.00442(8)   |              |
| <b>Co(1)</b> | 2b |             | 0.5         | 1           | 0           | 0.00917(10) | 0.01051(12) | 0.00837(12) | 0.00960(14)  | -0.00064(10) | 0.00566(10)  | -0.00144(11) |
| <b>Co(2)</b> | 4e | 0.74777(3)  | 1.37387(3)  | 0.01363(3)  | 0.01015(7)  | 0.00994(8)  | 0.01073(9)  | 0.01090(10) | 0.00204(7)   | 0.00595(7)   | 0.00275(8)   |              |
| <b>S(1)</b>  | 4e | 0.48255(5)  | 0.83820(4)  | 0.31066(5)  | 0.00783(11) | 0.00831(13) | 0.00830(14) | 0.00773(16) | -0.00050(11) | 0.00457(12)  | -0.00006(13) |              |
| <b>S(2)</b>  | 4e | 0.88458(4)  | 1.06796(5)  | 0.24608(5)  | 0.00828(11) | 0.00774(13) | 0.00926(14) | 0.00801(16) | 0.00040(11)  | 0.00396(12)  | 0.00087(13)  |              |
| <b>O(1)</b>  | 4e | 0.35219(16) | 0.90911(15) | 0.33221(17) | 0.0152(4)   | 0.0153(5)   | 0.0167(6)   | 0.0192(6)   | 0.0023(4)    | 0.0129(5)    | 0.0003(5)    |              |
| <b>O(2)</b>  | 4e | 0.36382(15) | 0.42461(15) | 0.10045(17) | 0.0153(4)   | 0.0125(5)   | 0.0153(5)   | 0.0181(6)   | 0.0054(4)    | 0.0075(5)    | 0.0064(5)    |              |
| <b>O(3)</b>  | 4e | 0.95590(16) | 1.49412(17) | 0.19357(18) | 0.0192(5)   | 0.0120(5)   | 0.0240(6)   | 0.0205(7)   | -0.0080(5)   | 0.0070(5)    | -0.0085(6)   |              |
| <b>O(4)</b>  | 4e | 0.87512(16) | 1.18443(15) | 0.12703(17) | 0.0149(4)   | 0.0162(5)   | 0.0145(5)   | 0.0167(6)   | 0.0043(4)    | 0.0102(5)    | 0.0080(5)    |              |
| <b>O(5)</b>  | 4e | 0.51180(16) | 0.67705(14) | 0.36682(17) | 0.0149(4)   | 0.0188(5)   | 0.0101(5)   | 0.0174(6)   | 0.0013(4)    | 0.0100(5)    | 0.0051(5)    |              |
| <b>O(6)</b>  | 4e | 0.87062(17) | 1.14308(16) | 0.37886(17) | 0.0172(5)   | 0.0204(6)   | 0.0201(6)   | 0.0159(6)   | -0.0070(5)   | 0.0127(5)    | -0.0078(5)   |              |
| <b>O(7)</b>  | 4e | 0.75352(15) | 0.95266(15) | 0.16169(16) | 0.0136(4)   | 0.0123(5)   | 0.0124(5)   | 0.0149(6)   | -0.0031(4)   | 0.0058(4)    | -0.0025(5)   |              |
| <b>O(8)</b>  | 4e | 0.43494(15) | 0.83290(15) | 0.13422(15) | 0.0138(4)   | 0.0160(5)   | 0.0176(6)   | 0.0081(5)   | -0.0024(4)   | 0.0062(4)    | 0.0000(5)    |              |

Table S5. Bond Valence Sums for 1  $\text{Cs}_2\text{Ni}_3(\text{SO}_4)_4$ , 2  $\text{Cs}_2\text{Co}_3(\text{SO}_4)_4$ , 3  $\text{Rb}_2\text{Ni}_3(\text{SO}_4)_4$  and 4  $\text{Rb}_2\text{Co}_3(\text{SO}_4)_4$  calculated using ref\*.

| 1 $\text{Cs}_2\text{Ni}_3(\text{SO}_4)_4$ |           | 2 $\text{Cs}_2\text{Co}_3(\text{SO}_4)_4$ |           |       |           | 3 $\text{Rb}_2\text{Ni}_3(\text{SO}_4)_4$ |           | 4 $\text{Rb}_2\text{Co}_3(\text{SO}_4)_4$ |            |
|-------------------------------------------|-----------|-------------------------------------------|-----------|-------|-----------|-------------------------------------------|-----------|-------------------------------------------|------------|
| atoms                                     | BVS       | atoms                                     | BVS       | atoms | BVS       | atoms                                     | BVS       | atoms                                     | BVS        |
| Cs1                                       | 1.050(6)  | Cs1                                       | 1.204(4)  | O5    | 2.034(14) | Rb1                                       | 1.291(3)  | Rb1                                       | 1.1517(18) |
| Ni1                                       | 1.915(12) | Cs2                                       | 1.212(4)  | O6    | 2.052(18) | Ni1                                       | 1.926(4)  | Co1                                       | 1.957(3)   |
| Ni2                                       | 1.915(12) | Co1                                       | 1.973(9)  | O7    | 2.166(16) | Ni2                                       | 1.915(4)  | Co2                                       | 1.964(3)   |
| S1                                        | 5.97(4)   | Co2                                       | 1.984(10) | O8    | 2.071(16) | S1                                        | 6.014(16) | S1                                        | 6.031(12)  |
| S2                                        | 5.92(5)   | Co3                                       | 2.007(9)  | O9    | 1.946(16) | S2                                        | 6.062(16) | S2                                        | 6.083(13)  |
| O1                                        | 2.01(3)   | S1                                        | 6.29(3)   | O10   | 1.959(13) | O1                                        | 2.202(9)  | O1                                        | 2.010(8)   |
| O2                                        | 2.02(3)   | S2                                        | 6.02(3)   | O11   | 2.13(2)   | O2                                        | 2.113(8)  | O2                                        | 2.077(5)   |
| O3                                        | 2.01(3)   | S3                                        | 6.04(3)   | O12   | 2.13(2)   | O3                                        | 2.071(8)  | O3                                        | 1.990(6)   |
| O4                                        | 1.97(2)   | S4                                        | 6.34(4)   | O13   | 2.013(15) | O4                                        | 2.014(8)  | O4                                        | 2.170(7)   |
| O5                                        | 1.89(2)   | O1                                        | 1.967(15) | O14   | 2.14(2)   | O5                                        | 2.027(10) | O5                                        | 2.119(6)   |
| O6                                        | 2.01(2)   | O2                                        | 2.090(14) | O15   | 2.18(2)   | O6                                        | 1.816(8)  | O6                                        | 2.016(8)   |
| O7                                        | 1.98(2)   | O3                                        | 1.967(14) | O16   | 2.14(2)   | O7                                        | 1.978(7)  | O7                                        | 1.976(5)   |
| O8                                        | 1.91(2)   | O4                                        | 2.091(18) |       |           | O8                                        | 2.024(9)  | O8                                        | 1.850(6)   |

\*Gagne and Hawthorne, Acta Cryst. 2015, B71, 562-578.

Table S6. Bond lengths (in Å) for  $A_2M_3(\text{SO}_4)_4$  ( $A = \text{Rb}, \text{Cs}$   $M = \text{Co}, \text{Ni}$ )

| (1) $\text{Cs}_2\text{Ni}_3(\text{SO}_4)_4$ |             | (2) $\text{Cs}_2\text{Co}_3(\text{SO}_4)_4$ |          |             |          | (3) $\text{Rb}_2\text{Ni}_3(\text{SO}_4)_4$ |            | (4) $\text{Rb}_2\text{Co}_3(\text{SO}_4)_4$ |            |
|---------------------------------------------|-------------|---------------------------------------------|----------|-------------|----------|---------------------------------------------|------------|---------------------------------------------|------------|
| Cs(1)-O(1)                                  | 3.043(5) x2 | Cs(1)-O(3)                                  | 3.027(4) | Co(2)-O(6)  | 1.995(3) | Rb(1)-O(1)                                  | 2.7751(18) | Rb(1)-O(4)                                  | 2.8072(13) |
| Cs(1)-O(3)                                  | 3.058(5)    | Cs(1)-O(4)                                  | 3.036(4) | Co(2)-O(16) | 2.003(4) | Rb(1)-O(2)                                  | 2.8889(19) | Rb(1)-O(2)                                  | 2.9297(13) |
| Cs(1)-O(2)                                  | 3.128(6)    | Cs(1)-O(7)                                  | 3.137(4) | Co(2)-O(12) | 2.021(4) | Rb(1)-O(3)                                  | 2.9201(19) | Rb(1)-O(5)                                  | 2.9304(14) |
| Cs(1)-O(3)                                  | 3.212(5)    | Cs(1)-O(2)                                  | 3.227(3) | Co(2)-O(2)  | 2.060(3) | Rb(1)-O(5)                                  | 2.9672(18) | Rb(1)-O(6)                                  | 2.9973(14) |

|            |            |             |          |             |          |            |            |            |            |
|------------|------------|-------------|----------|-------------|----------|------------|------------|------------|------------|
| Cs(1)-O(2) | 3.424(6)   | Cs(1)-O(1)  | 3.279(3) | Co(2)-O(10) | 2.109(3) | Rb(1)-O(8) | 2.9811(18) | Rb(1)-O(1) | 3.0003(14) |
| Cs(1)-O(3) | 3.437(6)   | Cs(1)-O(9)  | 3.284(3) |             |          | Rb(1)-O(4) | 3.0073(19) | Rb(1)-O(3) | 3.0194(15) |
| Cs(1)-O(5) | 3.449(5)   | Cs(1)-O(13) | 3.354(4) | Co(3)-O(11) | 1.999(4) | Rb(1)-O(7) | 3.0871(18) | Rb(1)-O(7) | 3.1278(14) |
|            |            | Cs(1)-O(14) | 3.366(5) | Co(3)-O(7)  | 2.038(4) | Rb(1)-O(7) | 3.1300(18) | Rb(1)-O(7) | 3.1426(14) |
| Ni(1)-O(8) | 2.006(5)   | Cs(1)-O(15) | 3.434(6) | Co(3)-O(14) | 2.061(4) |            |            |            |            |
| Ni(1)-O(8) | 2.006(5)   | Cs(1)-O(16) | 3.482(5) | Co(3)-O(1)  | 2.090(4) | Ni(1)-O(2) | 1.9856(17) | Co(1)-O(5) | 2.0112(13) |
| Ni(1)-O(4) | 2.077(5)x2 |             |          | Co(3)-O(3)  | 2.209(3) | Ni(1)-O(2) | 1.9856(17) | Co(1)-O(5) | 2.0112(13) |
| Ni(1)-O(5) | 2.165(5)x2 | Cs(2)-O(5)  | 3.058(4) | Co(3)-O(10) | 2.240(3) | Ni(1)-O(7) | 2.1097(17) | Co(1)-O(7) | 2.1438(13) |
|            |            | Cs(2)-O(8)  | 3.080(3) |             |          | Ni(1)-O(7) | 2.1097(17) | Co(1)-O(7) | 2.1438(13) |
| Ni(2)-O(1) | 2.009(5)   | Cs(2)-O(16) | 3.201(4) | S(1)-O(12)  | 1.447(4) | Ni(1)-O(6) | 2.1481(17) | Co(1)-O(8) | 2.1874(13) |
| Ni(2)-O(6) | 2.056(5)   | Cs(2)-O(2)  | 3.207(4) | S(1)-O(11)  | 1.453(4) | Ni(1)-O(6) | 2.1481(17) | Co(1)-O(8) | 2.1874(13) |
| Ni(2)-O(7) | 2.061(5)   | Cs(2)-O(13) | 3.241(4) | S(1)-O(13)  | 1.456(4) |            |            |            |            |
| Ni(2)-O(6) | 2.077(5)   | Cs(2)-O(12) | 3.243(4) | S(1)-O(5)   | 1.472(3) | Ni(2)-O(1) | 1.9759(17) | Co(2)-O(4) | 1.9990(13) |
| Ni(2)-O(4) | 2.118(5)   | Cs(2)-O(7)  | 3.270(4) |             |          | Ni(2)-O(3) | 2.0332(18) | Co(2)-O(2) | 2.0439(13) |
| Ni(2)-O(5) | 2.155(5)   | Cs(2)-O(6)  | 3.338(4) | S(2)-O(9)   | 1.459(4) | Ni(2)-O(8) | 2.0457(18) | Co(2)-O(6) | 2.0885(14) |
|            |            | Cs(2)-O(15) | 3.411(6) | S(2)-O(4)   | 1.461(3) | Ni(2)-O(5) | 2.0537(17) | Co(2)-O(1) | 2.0922(13) |
| S(1)-O(3)  | 1.438(5)   | Cs(2)-O(11) | 3.416(4) | S(2)-O(3)   | 1.470(4) | Ni(2)-O(4) | 2.0880(17) | Co(2)-O(3) | 2.1265(13) |
| S(1)-O(7)  | 1.445(5)   |             |          | S(2)-O(10)  | 1.511(3) | Ni(2)-O(6) | 2.3770(17) | Co(2)-O(8) | 2.3938(13) |
| S(1)-O(4)  | 1.509(5)   | Co(1)-O(15) | 2.044(4) |             |          |            |            |            |            |
| S(1)-O(5)  | 1.521(5)   | Co(1)-O(8)  | 2.077(4) | S(3)-O(8)   | 1.463(4) | S(1)-O(3)  | 1.4639(18) | S(1)-O(1)  | 1.4658(13) |
|            |            | Co(1)-O(5)  | 2.085(3) | S(3)-O(1)   | 1.469(3) | S(1)-O(5)  | 1.4649(18) | S(1)-O(5)  | 1.4663(13) |
| S(2)-O(2)  | 1.446(5)   | Co(1)-O(4)  | 2.093(3) | S(3)-O(6)   | 1.477(4) | S(1)-O(2)  | 1.4688(18) | S(1)-O(2)  | 1.4678(13) |
| S(2)-O(8)  | 1.469(5)   | Co(1)-O(9)  | 2.150(4) | S(3)-O(2)   | 1.482(3) | S(1)-O(6)  | 1.4967(17) | S(1)-O(8)  | 1.4896(14) |
| S(2)-O(1)  | 1.488(5)   | Co(1)-O(13) | 2.200(4) |             |          |            |            |            |            |
| S(2)-O(6)  | 1.517(5)   |             |          | S(4)-O(15)  | 1.431(4) | S(2)-O(4)  | 1.4634(18) | S(2)-O(3)  | 1.4614(13) |
|            |            |             |          | S(4)-O(14)  | 1.442(4) | S(2)-O(8)  | 1.4654(18) | S(2)-O(6)  | 1.4651(14) |
|            |            |             |          | S(4)-O(16)  | 1.467(4) | S(2)-O(1)  | 1.4734(18) | S(2)-O(4)  | 1.4728(13) |
|            |            |             |          | S(4)-O(7)   | 1.468(4) | S(2)-O(7)  | 1.4784(18) | S(2)-O(7)  | 1.4766(13) |
